# Supplementary material for: Electronic transitions and ESIPT kinetics of the thienyl-3-hydroxychromone nucleobase surrogate in DNA duplexes: a DFT/MD-TDDFT study
Source: Royal Society of Chemistry journal article supplement (doi:10.1039/c9ra10419d), 2020-01-01
Supplement: c9ra10419d1.pdf [file c9ra10419d1.pdf]

## Supporting Information

### **Electronic Transitions and ESIPT Kinetics of the Thienyl-3-Hydroxychromone Nucleobase Surrogate in DNA Duplexes: a DFT/MD-TDDFT Study**

Alain Sougnabé,<sup>a, c</sup> Daniel Lissouck,<sup>a, d</sup>, Fabien Fontaine-Vive, Mama Nsangou,<sup>c</sup> Yves Mély,<sup>e</sup> Alain Burger<sup>f</sup> and Cyril. A. Kenfack\*,<sup>a</sup>

<sup>a</sup> Laboratoire d'Optique et Applications, Centre de Physique Atomique Moléculaire et Optique Quantique, Faculté des Sciences Université de Douala, B.P. 8580 Douala, Cameroon

<sup>b</sup> Ecole Nationale polytechnique, Université de Yaoundé1, Cameroon

<sup>c</sup> Département de Physique, Faculté des Sciences Physiques, Ecole Normale Supérieure de Maroua, Université de Maroua, Cameroon

<sup>d</sup> Department of Renewable Energy, Higher Technical teachers' Training College, University of Buea, P.O. Box 249, Buea Road, Kumba, Cameroon

<sup>e</sup> Laboratoire de Bioimagerie et Pathologies, UMR 7021 du CNRS Faculté de Pharmacie, Université de Strasbourg, 74, Route du Rhin, 67401, Illkirch Cedex, France

<sup>f</sup> Institut de Chimie de Nice, UMR 7272, Université Côte d'Azur, CNRS, Parc Valrose, 06108 Nice Cedex 2, France

\* Corresponding author: ckenf@yahoo.com

**Figure S1:** Distribution of water molecules around **M**. (A) Radial distribution function  $g(r)$  of water molecules with respect to the **M** carbonyl oxygen in solution (black curve). The blue curve describes the variation of the number  $n$  of water molecules around **M** with the distance  $r$  to the **M** carbonyl oxygen.

**Figure S2:** Relative energies of **M** conformers obtained from PBE0-D/ TZVP calculations. The first syn denotes the cyclic O and S heteroatoms on the same side and anti on the opposite. The second syn denotes the OH of 3HC and the deoxyribose on the same side and anti on the opposite.

**Figure S3:** Root mean square deviation (RMSD) between the structures calculated along a MD trajectory and the MD average structure of **M**-labelled duplexes. **M** is taken in its N ground state and syn-anti conformation. The duplex was obtained by annealing d(CGT TTT **XM**X TTT TGC) with d(GCA AAA **YAb**Y AAA ACG), where **Ab** designates an abasic site. (black) **AMA+ TAbT** ; (blue) **TMT+ AAbA**; (red) **CMC+ GAbG**.

**Figure S4:** Side view of the average structures of 15-mer DNA duplexes containing the **XM**X+ **YAb**Y motif. These structures were obtained from 10ns molecular dynamic trajectories. X= A, T, C; Y= T, A, G, where Ab denote the abasic site. A) **AMA+ TAbT** B) **TMT+ AAbA** C) **CMC+ GAbG**.

**Figure S5:** Radial distribution functions of the water molecules with respect to the **M** carbonyl oxygen in the ground state, (black) **AMA+ TAbT** ; (blue) **TMT+ AAbA** ; (red) **CMC+ GAbG**.

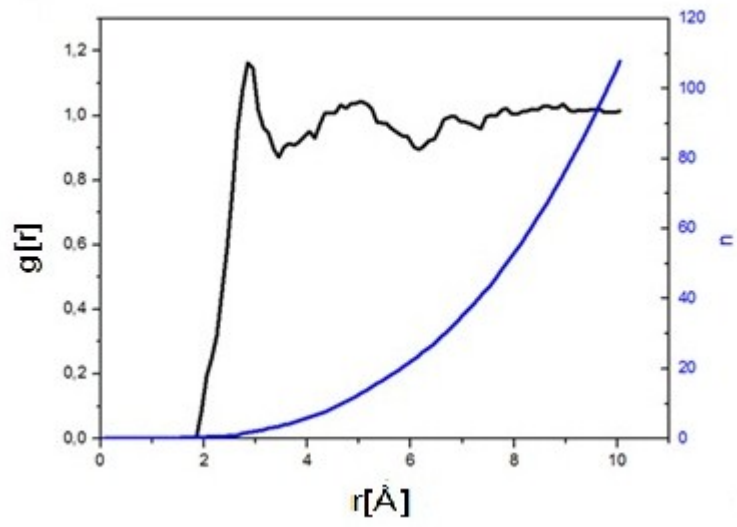

Figure S1

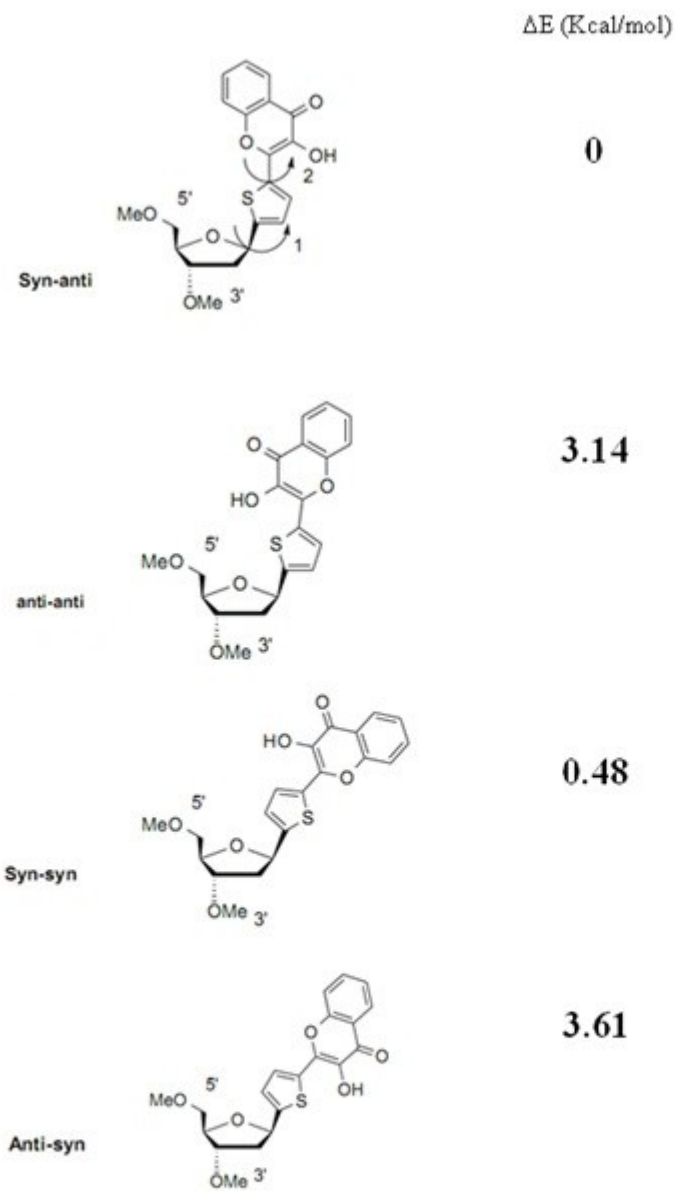

Figure S2

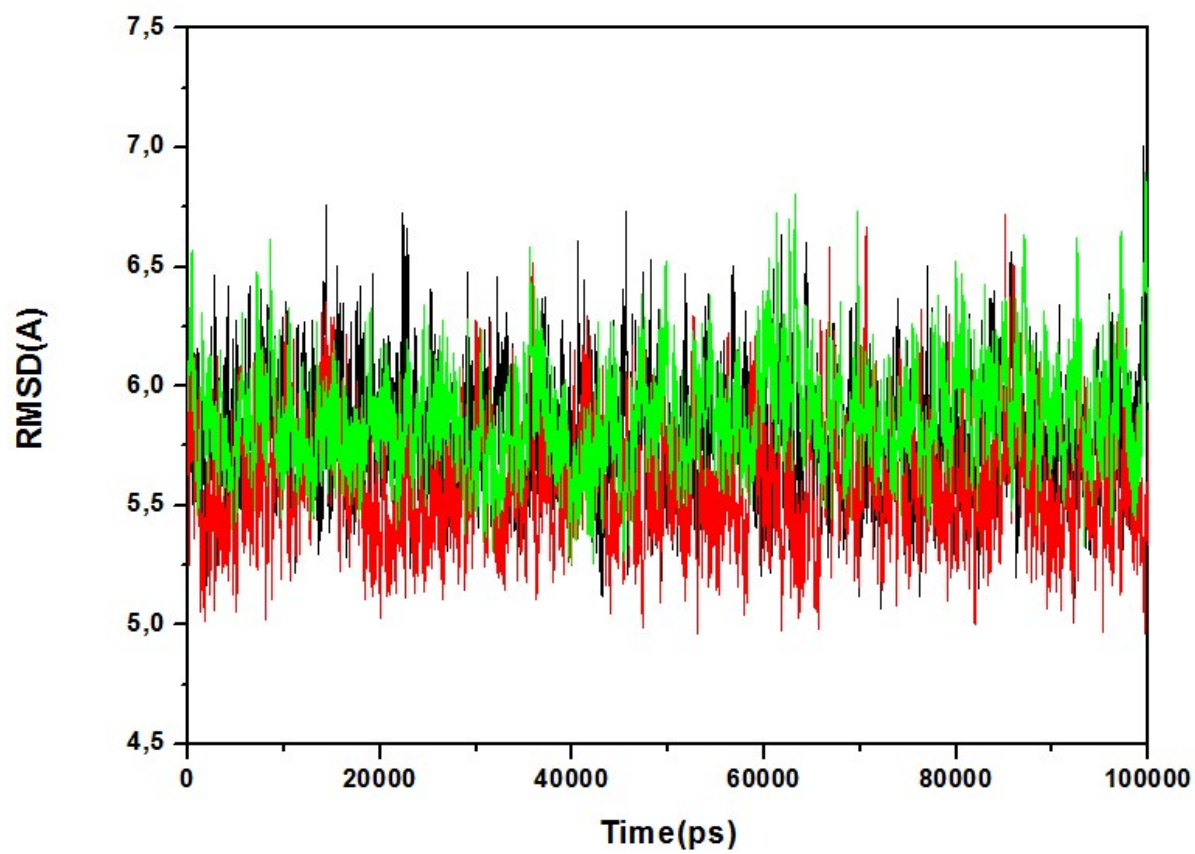

Figure S3

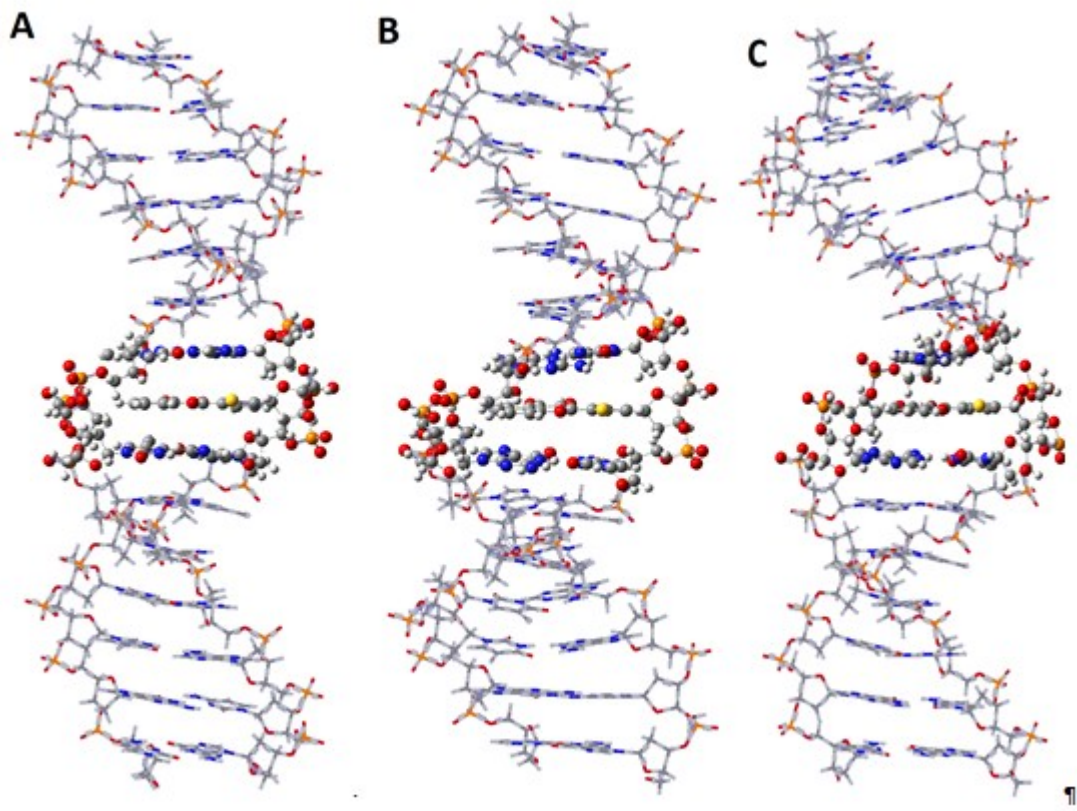

Figure S4

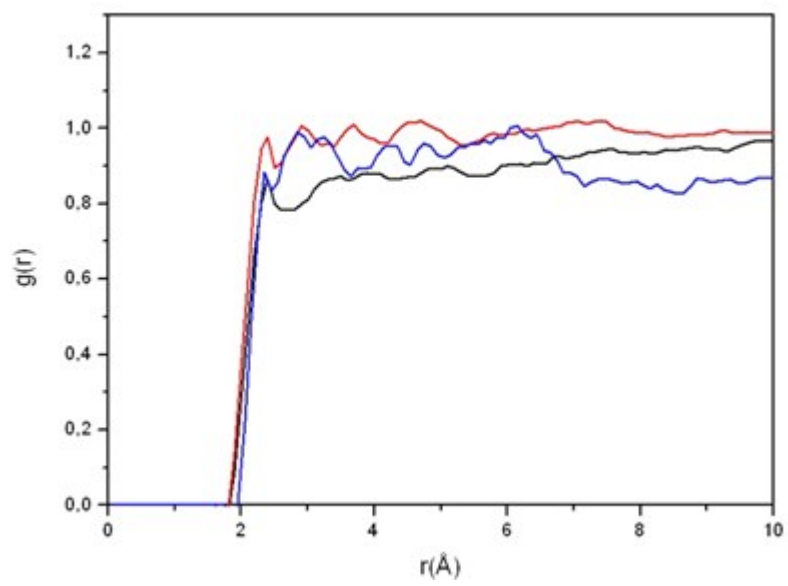

Figure S5

**Table S1:** Bond lengths and angles for **M** in M(H<sub>2</sub>O)<sub>3</sub> complexes. The bond lengths and angles were calculated in the ground state and first relaxed excited state of both the normal and tautomer forms. Calculations were performed by DFT and TDDFT at PBE0-D/TZVP level in bulk water.

| Bonds       | Bonds Lengths  |                                 |                                 | Angles            | Bonds angles   |                                 |                                 |
|-------------|----------------|---------------------------------|---------------------------------|-------------------|----------------|---------------------------------|---------------------------------|
|             | S <sub>0</sub> | S <sub>1</sub> <sup>N</sup> (R) | S <sub>1</sub> <sup>T</sup> (R) |                   | S <sub>0</sub> | S <sub>1</sub> <sup>N</sup> (R) | S <sub>1</sub> <sup>T</sup> (R) |
| S(1)-C(2)   | 1.740          | 1.710                           | 1.751                           | C(2)-S(1)-C(5)    | 92             | 91                              | 92                              |
| S(1)-C(5)   | 1.716          | 1.765                           | 1.719                           | S(1)-C(2)-C(3)    | 111            | 110                             | 110                             |
| C(2)-C(3)   | 1.380          | 1.380                           | 1.404                           | S(1)-C(2)-C(6)    | 119            | 118                             | 120                             |
| C(2)-C(6)   | 1.442          | 1.401                           | 1.402                           | C(3)-C(2)-C(6)    | 130            | 132                             | 130                             |
| C(3)-C(4)   | 1.416          | 1.397                           | 1.402                           | C(2)-C(3)-C(4)    | 113            | 112                             | 113                             |
| C(4)-C(5)   | 1.369          | 1.411                           | 1.380                           | C(3)-C(4)-C(5)    | 113            | 113                             | 113                             |
| C(6)-O(7)   | 1.357          | 1.360                           | 1.363                           | S(1)-C(5)-C(4)    | 112            | 112                             | 112                             |
| C(6)-C(11)  | 1.374          | 1.424                           | 1.434                           | C(2)-C(6)-O(7)    | 112            | 114                             | 114                             |
| O(7)-C(8)   | 1.353          | 1.372                           | 1.363                           | C(2)-C(6)-C(11)   | 126            | 127                             | 126                             |
| C(8)-C(9)   | 1.400          | 1.410                           | 1.413                           | O(7)-C(6)-C(11)   | 121            | 120                             | 120                             |
| C(8)-C(12)  | 1.397          | 1.382                           | 1.382                           | C(6)-O(7)-C(8)    | 121            | 122                             | 122                             |
| C(9)-C(10)  | 1.455          | 1.439                           | 1.415                           | O(7)-C(8)-C(9)    | 121            | 122                             | 121                             |
| C(9)-C(15)  | 1.405          | 1.413                           | 1.417                           | O(7)-C(8)-C(12)   | 117            | 116                             | 117                             |
| C(10)-C(11) | 1.450          | 1.462                           | 1.439                           | C(9)-C(8)-C(12)   | 122            | 122                             | 122                             |
| C(10)-O(16) | 1.243          | 1.270                           | 1.323                           | C(8)-C(9)-C(10)   | 120            | 120                             | 118                             |
| C(11)-O(17) | 1.342          | 1.310                           | 1.272                           | C(8)-C(9)-C(15)   | 122            | 117                             | 118                             |
| C(12)-C(13) | 1.384          | 1.401                           | 1.399                           | C(10)-C(9)-C(15)  | 119            | 122                             | 124                             |
| C(13)-C(14) | 1.405          | 1.394                           | 1.396                           | C(9)-C(10)-C(11)  | 116            | 115                             | 120                             |
| C(14)-C(15) | 1.381          | 1.388                           | 1.386                           | C(9)-C(10)-O(16)  | 123            | 128                             | 119                             |
|             |                |                                 |                                 | C(11)-C(10)-O(16) | 121            | 115                             | 120                             |
|             |                |                                 |                                 | C(6)-C(11)-C(10)  | 121            | 121                             | 118                             |
|             |                |                                 |                                 | C(6)-C(11)-O(17)  | 120            | 116                             | 122                             |



**Table S3:** Thermodynamic parameters of the **M**-labelled duplexes calculated along MD trajectories

$\Delta H$  is the enthalpy of duplexes bearing **M** in its four mentioned conformations using the MM-PBSA and MM-GBSA methods. Interestingly, the two methods indicated that the most stable duplexes were those with **M** in its syn-anti conformation. The fully matched wild-type duplex and the one containing A opposite an abasic site were analysed for further comparison. Both methods provided the same stability order:  $\Delta H(\mathbf{XAX+ YTY}; \text{wild type}) > \Delta H(\mathbf{XMX+ YAbY}; \mathbf{M} \text{ labelled}) > \Delta H(\mathbf{XAX+ YAbY}; \text{non labelled bearing an abasic site})$ , in agreement with experimental observations.<sup>7</sup>

| <b>System</b>      | <b><math>\Delta H</math> (kcal/mol)<br/>(MMPBSA)</b> | <b><math>\Delta H</math> (kcal/mol)<br/>(MMGB)</b> |
|--------------------|------------------------------------------------------|----------------------------------------------------|
| AAA+ TTT           | -87.82                                               | -63.61                                             |
| AAA+ TAbT          | -76.59                                               | -57.50                                             |
| AMA+ TAbTsyn-anti  | -80.0                                                | -61.35                                             |
| AMA+ TAbTanti-anti | -77.7                                                | -58.75                                             |
| AMA+ TAbTanti-syn  | -75.25                                               | -55.35                                             |
| AMA+ TAbTsyn-syn   | -73.48                                               | -55.30                                             |
| TAT+ ATA           | -90.01                                               | -64.55                                             |
| TAT+ AAbA          | -71.66                                               | -58.70                                             |
| TMT+ AAbA          | -83.53                                               | -61.94                                             |
| CAC+ GTG           | -96.56                                               | -72.31                                             |
| CAC+ GAbG          | -89.92                                               | -61.26                                             |
| CMC+ GAbG          | -91.97                                               | -68.73                                             |

**Table S4:** Helical, backbone and groove parameters calculated with the web 3DNA software for **M**-labelled and wild-type sequences. X-disp, Incl, Min-W, shear, stretch and other parameters are defined according to Reference 34.

Base pairs are perpendicular to the helical axis (Incl, Tip  $\approx 0$ )<sup>46</sup> and centred on this axis (Xdisp, Ydisp  $\approx 0$ ). The rise and twist are 3.4-3.7 Å and 36-39°, respectively whether they are evaluated from interbase pair rotation (Rise and Twist) or from translation and rotation with respect to the helical axis (H-rise and H-Twist), in agreement with the standard rise (3.4 Å) and twist (36°) reported for B DNA.<sup>46</sup> The groove parameters are also satisfactorily reproduced, as the major and minor grooves are respectively 10-11.7 Å and 5.1-6.4 Å for the considered duplexes, very close to the standard values of 11.7 Å and 5.7 Å. Lastly, the values of the torsion angles  $\alpha$ ,  $\beta$ ,  $\gamma$ ,  $\delta$ , and  $\epsilon$  describing the backbone segments associated with each nucleotide were compared. Among these angles, the most relevant are  $\delta$  and  $\alpha$  describing the torsions of the furanose sugar and the helix turn, respectively.  $\delta$  range is 120-130°, in agreement with the 70-170° values indicated for B DNA, while  $\alpha$  varies between -65 and -70°, in agreement with the experimental values comprised between -41 and -90° for B-DNA. The structural parameters corresponding to wild-type and **M**-labelled DNA are thus very close, indicating that **M** minimally perturbs the conformation of DNA



**Table S5**

Maxima absorption  $\lambda_{\text{abs}}$  and emission ( $\lambda_{\text{N}^*}$  and  $\lambda_{\text{T}^*}$ ) wavelengths and corresponding oscillator strengths calculated for the different M conformers in the trimers with TDDFT at the PBE0-D/TZVP level

| Structure         | $\lambda_{\text{abs}}$ (nm) | f    | $\lambda_{\text{N}^*}$ (nm) | $\lambda_{\text{T}^*}$ (nm) |
|-------------------|-----------------------------|------|-----------------------------|-----------------------------|
| AMA+TAbTsyn-anti  | 375                         | 0.53 | 426                         | 542                         |
| AMA+TAbTanti-syn  | 377                         | 0.50 | 444                         | 577                         |
| AMA+TAbTsyn-syn   | 377                         | 0.44 | 425                         | 543                         |
| AMA+TAbTanti-anti | 382                         | 0.38 | 420                         | 527                         |
